# Supplementary material
Source: MDPI journal article supplement (https://www.mdpi.com/2311-5637/10/2/94)
Supplement: s1 [file s1]

**Table S1.** The relationship involving the number of the first 30 bacteria species found in the yak rumen and rumen fermentation parameters.

|                                  | Items                                        | NH <sub>3</sub> -N | MCP     | Acetic acid | Propionic acid | Isobutyric acid | Butyric acid | Isovaleric acid | Valeric acid | T-VFA   |
|----------------------------------|----------------------------------------------|--------------------|---------|-------------|----------------|-----------------|--------------|-----------------|--------------|---------|
| Correlation Coefficient <i>r</i> | <i>g__Prevotella</i>                         | -0.0835            | 0.2796  | 0.3791      | 0.4332         | -0.0598         | 0.3971       | -0.0916         | 0.4075       | 0.3986  |
|                                  | <i>g__unclassified_d__Bacteria</i>           | -0.0838            | 0.3731  | 0.1233      | 0.1230         | -0.0612         | 0.0684       | 0.0799          | 0.0322       | 0.1173  |
|                                  | <i>g__unclassified_o__Bacteroidales</i>      | -0.3273            | -0.3589 | 0.2927      | 0.3403         | -0.0745         | 0.3612       | 0.0644          | 0.3908       | 0.3189  |
|                                  | <i>g__unclassified_o__Clostridiales</i>      | -0.0011            | -0.3141 | -0.1744     | -0.2907        | 0.1028          | -0.2871      | -0.0441         | -0.2996      | -0.2190 |
|                                  | <i>g__Bacteroides</i>                        | -0.3413            | 0.2032  | 0.6545      | 0.6406         | 0.0639          | 0.5724       | 0.1356          | 0.5395       | 0.6526  |
|                                  | <i>g__unclassified_f__Lachnospiraceae</i>    | 0.0430             | -0.1950 | -0.1126     | -0.2111        | 0.0110          | -0.1188      | -0.0639         | -0.1546      | -0.1376 |
|                                  | <i>g__unclassified_f__Rikenellaceae</i>      | 0.0560             | -0.0517 | -0.1312     | -0.2009        | 0.0941          | -0.1171      | 0.0139          | -0.1106      | -0.1453 |
|                                  | <i>g__unclassified_f__Ruminococcaceae</i>    | 0.1551             | -0.1180 | -0.1177     | -0.2057        | 0.0807          | -0.2629      | 0.0764          | -0.2483      | -0.1585 |
|                                  | <i>g__Methanobrevibacter</i>                 | 0.0461             | -0.0727 | -0.1333     | -0.1730        | 0.0372          | -0.1080      | 0.0158          | -0.1382      | -0.1403 |
|                                  | <i>g__unclassified_p__Firmicutes</i>         | 0.0346             | -0.1573 | 0.0292      | -0.0956        | 0.2718          | -0.1702      | 0.1736          | -0.1605      | -0.0224 |
|                                  | <i>g__unclassified_f__Prevotellaceae</i>     | -0.2246            | 0.3315  | 0.4929      | 0.5036         | -0.1053         | 0.4314       | -0.1652         | 0.4168       | 0.4918  |
|                                  | <i>g__unclassified_p__Lentisphaerae</i>      | -0.0181            | -0.2372 | 0.0896      | 0.1360         | -0.1513         | 0.0070       | 0.0054          | 0.1083       | 0.0890  |
|                                  | <i>g__unclassified_p__Bacteroidetes</i>      | -0.3005            | -0.0914 | 0.5227      | 0.5683         | -0.1220         | 0.4948       | 0.1535          | 0.5108       | 0.5387  |
|                                  | <i>g__Ruminococcus</i>                       | -0.1240            | -0.2166 | -0.0117     | -0.1410        | 0.0477          | -0.1276      | -0.0420         | -0.1789      | -0.0575 |
|                                  | <i>g__Clostridium</i>                        | 0.1953             | 0.0521  | -0.0056     | -0.1295        | 0.4915          | -0.2398      | 0.3404          | -0.2446      | -0.0595 |
|                                  | <i>g__Butyrivibrio</i>                       | 0.2706             | -0.2512 | -0.4017     | -0.4385        | 0.0759          | -0.5361      | 0.0856          | -0.4774      | -0.4344 |
|                                  | <i>g__Alistipes</i>                          | -0.0666            | -0.0184 | 0.1427      | 0.0847         | 0.2142          | 0.0706       | 0.2012          | 0.0749       | 0.1261  |
|                                  | <i>g__Succiniclasicum</i>                    | 0.6184             | 0.1570  | -0.1194     | -0.1686        | 0.4407          | -0.3216      | 0.4757          | -0.2193      | -0.1521 |
|                                  | <i>g__unclassified_c__Clostridia</i>         | -0.0328            | -0.2436 | -0.0460     | -0.1683        | 0.2406          | -0.1869      | 0.0884          | -0.1998      | -0.0912 |
|                                  | <i>g__unclassified_f__Porphyromonadaceae</i> | -0.0996            | -0.0062 | 0.1554      | 0.2673         | 0.1308          | 0.1108       | 0.3392          | 0.1682       | 0.1810  |
|                                  | <i>g__Eubacterium</i>                        | -0.0214            | -0.3122 | -0.0287     | -0.1583        | 0.0063          | 0.0525       | -0.1259         | -0.0054      | -0.0468 |
|                                  | <i>g__Selenomonas</i>                        | 0.1318             | 0.5457  | 0.2365      | 0.1229         | 0.4991          | -0.0174      | 0.3845          | -0.0692      | 0.1861  |

|                 |                                               |         |         |         |         |         |         |         |         |         |
|-----------------|-----------------------------------------------|---------|---------|---------|---------|---------|---------|---------|---------|---------|
|                 | <i>g__Sarcina</i>                             | -0.1196 | -0.2175 | -0.0540 | -0.0713 | -0.0726 | 0.0141  | -0.0846 | -0.0162 | -0.0504 |
|                 | <i>g__unclassified_f__Erysipelotrichaceae</i> | 0.1309  | 0.1556  | 0.2708  | 0.1532  | 0.0120  | 0.0546  | 0.1091  | 0.0532  | 0.2197  |
|                 | <i>g__unclassified_p__Verrucomicrobia</i>     | -0.0155 | -0.3325 | -0.2599 | -0.1487 | -0.2087 | -0.2697 | -0.1088 | -0.1672 | -0.2438 |
|                 | <i>g__Stylonychia</i>                         | 0.2558  | -0.1739 | -0.5217 | -0.4822 | -0.0667 | -0.3812 | -0.0590 | -0.3690 | -0.5027 |
|                 | <i>g__Oscillibacter</i>                       | -0.0435 | -0.1127 | -0.0010 | -0.0837 | 0.2497  | -0.1293 | 0.0495  | -0.1453 | -0.0356 |
|                 | <i>g__Parabacteroides</i>                     | -0.3280 | 0.0755  | 0.6848  | 0.7006  | 0.0614  | 0.6139  | 0.2057  | 0.6126  | 0.6926  |
|                 | <i>g__Fibrobacter</i>                         | -0.2031 | -0.1856 | 0.5521  | 0.7402  | -0.0730 | 0.6717  | 0.1714  | 0.7834  | 0.6227  |
|                 | <i>g__Stentor</i>                             | 0.2550  | -0.1674 | -0.5136 | -0.4733 | -0.0618 | -0.3718 | -0.0523 | -0.3602 | -0.4939 |
| <i>p</i> -Value | <i>g__Prevotella</i>                          | 0.6980  | 0.1858  | 0.0677  | 0.0345  | 0.7813  | 0.0547  | 0.6705  | 0.0481  | 0.0537  |
|                 | <i>g__unclassified_d__Bacteria</i>            | 0.6971  | 0.0726  | 0.5660  | 0.5668  | 0.7765  | 0.7508  | 0.7105  | 0.8814  | 0.5852  |
|                 | <i>g__unclassified_o__Bacteroidales</i>       | 0.1184  | 0.0850  | 0.1651  | 0.1037  | 0.7295  | 0.0829  | 0.7650  | 0.0590  | 0.1288  |
|                 | <i>g__unclassified_o__Clostridiales</i>       | 0.9959  | 0.1350  | 0.4150  | 0.1681  | 0.6325  | 0.1737  | 0.8380  | 0.1550  | 0.3038  |
|                 | <i>g__Bacteroides</i>                         | 0.1027  | 0.3410  | 0.0005  | 0.0007  | 0.7668  | 0.0035  | 0.5274  | 0.0065  | 0.0005  |
|                 | <i>g__unclassified_f__Lachnospiraceae</i>     | 0.8420  | 0.3611  | 0.6005  | 0.3221  | 0.9591  | 0.5805  | 0.7666  | 0.4709  | 0.5215  |
|                 | <i>g__unclassified_f__Rikenellaceae</i>       | 0.7950  | 0.8104  | 0.5411  | 0.3466  | 0.6620  | 0.5857  | 0.9486  | 0.6070  | 0.4980  |
|                 | <i>g__unclassified_f__Ruminococcaceae</i>     | 0.4693  | 0.5830  | 0.5838  | 0.3350  | 0.7079  | 0.2146  | 0.7229  | 0.2420  | 0.4594  |
|                 | <i>g__Methanobrevibacter</i>                  | 0.8305  | 0.7357  | 0.5345  | 0.4188  | 0.8631  | 0.6154  | 0.9415  | 0.5196  | 0.5132  |
|                 | <i>g__unclassified_p__Firmicutes</i>          | 0.8725  | 0.4629  | 0.8923  | 0.6569  | 0.1988  | 0.4267  | 0.4172  | 0.4539  | 0.9171  |
|                 | <i>g__unclassified_f__Prevotellaceae</i>      | 0.2913  | 0.1136  | 0.0144  | 0.0121  | 0.6243  | 0.0353  | 0.4404  | 0.0427  | 0.0146  |
|                 | <i>g__unclassified_p__Lentisphaerae</i>       | 0.9331  | 0.2645  | 0.6773  | 0.5264  | 0.4803  | 0.9743  | 0.9801  | 0.6143  | 0.6793  |
|                 | <i>g__unclassified_p__Bacteroidetes</i>       | 0.1537  | 0.6712  | 0.0088  | 0.0038  | 0.5700  | 0.0140  | 0.4740  | 0.0108  | 0.0066  |
|                 | <i>g__Ruminococcus</i>                        | 0.5639  | 0.3093  | 0.9569  | 0.5111  | 0.8248  | 0.5525  | 0.8455  | 0.4030  | 0.7897  |
|                 | <i>g__Clostridium</i>                         | 0.3603  | 0.8090  | 0.9792  | 0.5464  | 0.0147  | 0.2590  | 0.1036  | 0.2494  | 0.7823  |
|                 | <i>g__Butyrivibrio</i>                        | 0.2010  | 0.2364  | 0.0517  | 0.0321  | 0.7246  | 0.0069  | 0.6908  | 0.0183  | 0.0339  |
|                 | <i>g__Alistipes</i>                           | 0.7572  | 0.9319  | 0.5061  | 0.6939  | 0.3149  | 0.7430  | 0.3458  | 0.7280  | 0.5571  |
|                 | <i>g__Succiniclacticum</i>                    | 0.0013  | 0.4637  | 0.5783  | 0.4310  | 0.0311  | 0.1254  | 0.0188  | 0.3032  | 0.4781  |

|                                               |        |        |        |        |        |        |        |        |        |
|-----------------------------------------------|--------|--------|--------|--------|--------|--------|--------|--------|--------|
| <i>g__unclassified_c__Clostridia</i>          | 0.8791 | 0.2514 | 0.8310 | 0.4319 | 0.2574 | 0.3818 | 0.6814 | 0.3492 | 0.6716 |
| <i>g__unclassified_f__Porphyromonadaceae</i>  | 0.6434 | 0.9769 | 0.4684 | 0.2067 | 0.5423 | 0.6062 | 0.1049 | 0.4319 | 0.3973 |
| <i>g__Eubacterium</i>                         | 0.9210 | 0.1375 | 0.8942 | 0.4600 | 0.9767 | 0.8077 | 0.5577 | 0.9801 | 0.8281 |
| <i>g__Selenomonas</i>                         | 0.5392 | 0.0058 | 0.2658 | 0.5672 | 0.0130 | 0.9358 | 0.0636 | 0.7480 | 0.3838 |
| <i>g__Sarcina</i>                             | 0.5779 | 0.3073 | 0.8020 | 0.7405 | 0.7360 | 0.9479 | 0.6944 | 0.9402 | 0.8151 |
| <i>g__unclassified_f__Erysipelotrichaceae</i> | 0.5420 | 0.4679 | 0.2005 | 0.4748 | 0.9555 | 0.7999 | 0.6118 | 0.8050 | 0.3022 |
| <i>g__unclassified_p__Verrucomicrobia</i>     | 0.9427 | 0.1124 | 0.2200 | 0.4881 | 0.3277 | 0.2024 | 0.6127 | 0.4348 | 0.2509 |
| <i>g__Stylonychia</i>                         | 0.2277 | 0.4165 | 0.0089 | 0.0170 | 0.7569 | 0.0661 | 0.7843 | 0.0760 | 0.0123 |
| <i>g__Oscillibacter</i>                       | 0.8401 | 0.6000 | 0.9963 | 0.6975 | 0.2392 | 0.5470 | 0.8184 | 0.4980 | 0.8689 |
| <i>g__Parabacteroides</i>                     | 0.1176 | 0.7259 | 0.0002 | 0.0001 | 0.7757 | 0.0014 | 0.3349 | 0.0015 | 0.0002 |
| <i>g__Fibrobacter</i>                         | 0.3411 | 0.3851 | 0.0052 | 0.0000 | 0.7346 | 0.0003 | 0.4231 | 0.0000 | 0.0012 |
| <i>g__Stentor</i>                             | 0.2291 | 0.4342 | 0.0103 | 0.0195 | 0.7742 | 0.0736 | 0.8082 | 0.0838 | 0.0142 |
