# Supplementary material
Source: MDPI journal article supplement (https://www.mdpi.com/2311-5637/10/2/94)
Supplement: s1 [file s1]

## CERTIFICATE OF LANGUAGE EDITING

The English writing of the following manuscript was carefully edited by a native English speaker.

### Manuscript Information

|                                       |                                                                                                                                                                                                                                                                                                                                                                                                                                                                                                                                                                                                                                                                                                                                                                                          |
|---------------------------------------|------------------------------------------------------------------------------------------------------------------------------------------------------------------------------------------------------------------------------------------------------------------------------------------------------------------------------------------------------------------------------------------------------------------------------------------------------------------------------------------------------------------------------------------------------------------------------------------------------------------------------------------------------------------------------------------------------------------------------------------------------------------------------------------|
| ID                                    | AE202309210464                                                                                                                                                                                                                                                                                                                                                                                                                                                                                                                                                                                                                                                                                                                                                                           |
| Editing date                          | 2023-09-26                                                                                                                                                                                                                                                                                                                                                                                                                                                                                                                                                                                                                                                                                                                                                                               |
| Title                                 | Effect of isopropyl ester of hydroxy analogue of methionine on rumen microbiome, active enzymes, and protein metabolism pathways of yak                                                                                                                                                                                                                                                                                                                                                                                                                                                                                                                                                                                                                                                  |
| Corresponding author                  | Haibo Wang                                                                                                                                                                                                                                                                                                                                                                                                                                                                                                                                                                                                                                                                                                                                                                               |
| Language writing before editing       | <input type="checkbox"/> Very poor <input type="checkbox"/> Poor <input type="checkbox"/> Fair <input checked="" type="checkbox"/> Good <input type="checkbox"/> Very good <input type="checkbox"/> Excellent                                                                                                                                                                                                                                                                                                                                                                                                                                                                                                                                                                            |
| Recommendation after language editing | <input type="checkbox"/> Submitting to target journal directly<br><input checked="" type="checkbox"/> Submitting to target journal after minor revision<br><input type="checkbox"/> Re-editing required after major revision<br><input type="checkbox"/> Not suitable for publication                                                                                                                                                                                                                                                                                                                                                                                                                                                                                                    |
| Overview comments                     | This manuscript was edited for grammar and clarity and was improved. It reads well and the logic of the experimental set-up and the explanations of the results are clearly presented. Please check all edits carefully to be sure your meaning remains intact. There are also some comments in the margins with suggestions for potential modifications. Please be sure that the methods section is sufficiently detailed for your target journal (add details of how many samples processing, sequencing depth, etc.). Be sure the figures, tables, legends, and other material not included here are presented clearly. After addressing the comments and incorporation of the suggested edits, the revised manuscript should be ready to be submitted for publication consideration. |

### Edited by

**Rachel M.**

Professional Editor  
University of Wisconsin  
Biotechnology & Applied Microbiology

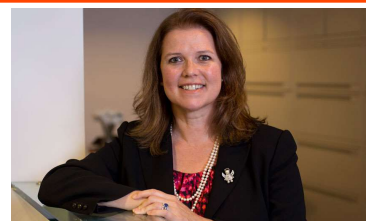

### Certificate Issued by

**Dr. Jason Qee**

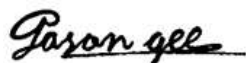

Editor in Chief  
Editorbar Language Editing, Beijing, China  
[runse@editorbar.com](mailto:runse@editorbar.com)   [www.editorbar.com](http://www.editorbar.com)

Certificate link: [www.editorbar.com/order/cert/AE202309210464](http://www.editorbar.com/order/cert/AE202309210464)
